# Supplementary material for: In Silico Analysis of Anti-Inflammatory and Antioxidant Properties of Bioactive Compounds from Crescentia cujete L
Source: MDPI journal article supplement (doi:10.3390/molecules28083547), 2023-04-18
Supplement: s1 [file s1]

**Table S1.** Physicochemical Properties

| Molecule                  | Luteolin                                       | Eriodictyol                                    | Pinocembrin                                    | Naringenin                                     | Quercetin                                      | Apigenin                                       | Ferulic Acid                                   |
|---------------------------|------------------------------------------------|------------------------------------------------|------------------------------------------------|------------------------------------------------|------------------------------------------------|------------------------------------------------|------------------------------------------------|
| Formula                   | C <sub>15</sub> H <sub>10</sub> O <sub>6</sub> | C <sub>15</sub> H <sub>12</sub> O <sub>6</sub> | C <sub>15</sub> H <sub>12</sub> O <sub>4</sub> | C <sub>15</sub> H <sub>12</sub> O <sub>5</sub> | C <sub>15</sub> H <sub>10</sub> O <sub>7</sub> | C <sub>15</sub> H <sub>10</sub> O <sub>5</sub> | C <sub>10</sub> H <sub>10</sub> O <sub>4</sub> |
| MW                        | 286.24                                         | 288.25                                         | 256.25                                         | 272.25                                         | 302.24                                         | 270.24                                         | 194.18                                         |
| #Heavy atoms              | 21                                             | 21                                             | 19                                             | 20                                             | 22                                             | 20                                             | 14                                             |
| #Aromatic heavy atoms     | 16                                             | 12                                             | 12                                             | 12                                             | 16                                             | 16                                             | 6                                              |
| Fraction Csp <sup>3</sup> | 0                                              | 0.13                                           | 0.13                                           | 0.13                                           | 0                                              | 0                                              | 0.1                                            |
| #Rotatable bonds          | 1                                              | 1                                              | 1                                              | 1                                              | 1                                              | 1                                              | 3                                              |
| #H-bond acceptors         | 6                                              | 6                                              | 4                                              | 5                                              | 7                                              | 5                                              | 4                                              |
| #H-bond donors            | 4                                              | 4                                              | 2                                              | 3                                              | 5                                              | 3                                              | 2                                              |
| MR                        | 76.01                                          | 73.59                                          | 69.55                                          | 71.57                                          | 78.03                                          | 73.99                                          | 51.63                                          |
| TPSA                      | 111.13                                         | 107.22                                         | 66.76                                          | 86.99                                          | 131.36                                         | 90.9                                           | 66.76                                          |

**Table S2.** Lipophilicity and water solubility

| Molecule                      | Luteolin           | Eriodictyol | Pinocembrin | Naringenin | Quercetin | Apigenin           | Ferulic Acid |
|-------------------------------|--------------------|-------------|-------------|------------|-----------|--------------------|--------------|
| iLOGP                         | 1.86               | 1.62        | 2.11        | 1.75       | 1.63      | 1.89               | 1.62         |
| XLOGP3                        | 2.53               | 2.02        | 2.88        | 2.52       | 1.54      | 3.02               | 1.51         |
| WLOGP                         | 2.28               | 1.89        | 2.48        | 2.19       | 1.99      | 2.58               | 1.39         |
| MLOGP                         | -0.03              | 0.16        | 1.27        | 0.71       | -0.56     | 0.52               | 1            |
| Silicos-IT Log P              | 2.03               | 1.56        | 2.55        | 2.05       | 1.54      | 2.52               | 1.26         |
| Consensus Log P               | 1.73               | 1.45        | 2.26        | 1.84       | 1.23      | 2.11               | 1.36         |
| ESOL Log S                    | -3.71              | -3.26       | -3.64       | -3.49      | -3.16     | -3.94              | -2.11        |
| ESOL Solubility (mg/ml)       | 5.63E-02           | 1.60E-01    | 5.81E-02    | 8.74E-02   | 2.11E-01  | 3.07E-02           | 1.49E+00     |
| ESOL Solubility (mol/l)       | 1.97E-04           | 5.54E-04    | 2.27E-04    | 3.21E-04   | 6.98E-04  | 1.14E-04           | 7.68E-03     |
| ESOL Class                    | Soluble            | Soluble     | Soluble     | Soluble    | Soluble   | Soluble            | Soluble      |
| Ali Log S                     | -4.51              | -3.9        | -3.94       | -3.99      | -3.91     | -4.59              | -2.52        |
| Ali Solubility (mg/ml)        | 8.84E-03           | 3.64E-02    | 2.93E-02    | 2.77E-02   | 3.74E-02  | 6.88E-03           | 5.86E-01     |
| Ali Solubility (mol/l)        | 3.09E-05           | 1.26E-04    | 1.14E-04    | 1.02E-04   | 1.24E-04  | 2.55E-05           | 3.02E-03     |
| Ali Class                     | Moderately soluble | Soluble     | Soluble     | Soluble    | Soluble   | Moderately soluble | Soluble      |
| Silicos-IT LogSw              | -3.82              | -2.84       | -4          | -3.42      | -3.24     | -4.4               | -1.42        |
| Silicos-IT Solubility (mg/ml) | 4.29E-02           | 4.19E-01    | 2.58E-02    | 1.04E-01   | 1.73E-01  | 1.07E-02           | 7.43E+00     |
| Silicos-IT Solubility (mol/l) | 1.50E-04           | 1.45E-03    | 1.01E-04    | 3.82E-04   | 5.73E-04  | 3.94E-05           | 3.83E-02     |
| Silicos-IT class              | Soluble            | Soluble     | Soluble     | Soluble    | Soluble   | Moderately soluble | Soluble      |

**Table S3.** Pharmacokinetics

| Molecule          | Luteolin | Eriodictyol | Pinocembrin | Naringenin | Quercetin | Apigenin | Ferulic Acid |
|-------------------|----------|-------------|-------------|------------|-----------|----------|--------------|
| GI absorption     | High     | High        | High        | High       | High      | High     | High         |
| BBB permeant      | No       | No          | Yes         | No         | No        | No       | Yes          |
| Pgp substrate     | No       | Yes         | No          | Yes        | No        | No       | No           |
| CYP1A2 inhibitor  | Yes      | No          | Yes         | Yes        | Yes       | Yes      | No           |
| CYP2C19 inhibitor | No       | No          | Yes         | No         | No        | No       | No           |
| CYP2C9 inhibitor  | No       | No          | No          | No         | No        | No       | No           |
| CYP2D6 inhibitor  | Yes      | No          | No          | No         | Yes       | Yes      | No           |
| CYP3A4 inhibitor  | Yes      | Yes         | No          | Yes        | Yes       | Yes      | No           |
| log Kp (cm/s)     | -6.25    | -6.62       | -5.82       | -6.17      | -7.05     | -5.8     | -6.41        |

**Table S4. Drug Likeness**

[illegible]

**Table S5.** Medical Chemistry

| Molecule                 | Luteolin | Eriodictyol | Pinocembrin | Naringenin | Quercetin | Apigenin | Ferulic Acid |
|--------------------------|----------|-------------|-------------|------------|-----------|----------|--------------|
| PAINS #alerts            | 1        | 1           | 0           | 0          | 1         | 0        | 0            |
| Brenk #alerts            | 1        | 1           | 0           | 0          | 1         | 0        | 1            |
| Leadlikeness #violations | 0        | 0           | 0           | 0          | 0         | 0        | 1            |
| Synthetic Accessibility  | 3.02     | 3.11        | 2.96        | 3.01       | 3.23      | 2.96     | 1.93         |

**Table S6.** Toxicity

| Molecule                          | Luteolin | Eriodictyol | Pinocembrin | Naringenin | Quercetin | Apigenin | Ferulic Acid |
|-----------------------------------|----------|-------------|-------------|------------|-----------|----------|--------------|
| AMES toxicity                     | No       | No          | Yes         | Yes        | No        | No       | No           |
| Max. tolerated dose (human)       | 0.564    | -0.239      | 0.276       | 0.499      | 0.775     | 0.337    | 0.986        |
| hERG I inhibitor                  | No       | No          | No          | No         | No        | No       | No           |
| hERG II inhibitor                 | No       | No          | No          | No         | No        | No       | No           |
| Oral Rat Acute Toxicity (LD50)    | 2.453    | 2.257       | 2.13        | 2.01       | 2.607     | 1.978    | 2.281        |
| Oral Rat Chronic Toxicity (LOAEL) | 1.537    | 1.855       | 2.32        | 2.27       | 2.464     | 1.959    | 1.909        |
| Hepatotoxicity                    | No       | No          | No          | No         | No        | No       | No           |
| Skin Sensitisation                | No       | No          | No          | No         | No        | No       | No           |
| T.Pyriformis toxicity             | 0.428    | 0.422       | 0.882       | 0.532      | 0.335     | 0.517    | 0.028        |
| Minnow toxicity                   | 1.346    | 3.052       | 1.96        | 1.294      | 1.957     | 1.17     | 2.294        |

**Table S7.** Molecular Docking Best scored ligand-protein complex data for all 7 ligands with receptors 3V99, 4L9S and 3LN0

| <b>3V99</b>          | Indomethacin | Luteolin | Eriodictyol | Pinocembrin | Naringenin | Quercetin | Apigenin | Ferulic Acid |
|----------------------|--------------|----------|-------------|-------------|------------|-----------|----------|--------------|
| binding energy       | -8.31        | -9.09    | -10.02      | -11.29      | -10.77     | -9.38     | -9.17    | -7.3         |
| ligand efficiency    | -0.33        | -0.43    | -0.48       | -0.59       | -0.54      | -0.43     | -0.46    | -0.52        |
| inhib constant       | 804.47       | 216.67   | 45.51       | 5.29        | 12.7       | 132.94    | 189.42   | 4.48         |
| inhib constant units | nM           | nM       | nM          | nM          | nM         | nM        | nM       | uM           |
| intermol energy      | -9.51        | -10.58   | -11.51      | -11.89      | -11.67     | -11.17    | -10.36   | -9.09        |
| vdw hb desolv energy | -9.51        | -10.58   | -11.51      | -11.89      | -11.67     | -11.17    | -10.36   | -9.09        |
| electrostatic energy | 0            | 0        | 0           | 0           | 0          | 0         | 0        | 0            |
| total internal       | -1.54        | -1.99    | 15.37       | -0.3        | -0.1       | -2.72     | -1.04    | 17.73        |
| torsional energy     | 1.19         | 1.49     | 1.49        | 0.6         | 0.89       | 1.79      | 1.19     | 1.79         |
| unbound energy       | -1.54        | -1.99    | 15.37       | -0.3        | -0.1       | -2.72     | -1.04    | 17.73        |
| cIRMS                | 0            | 0        | 0           | 0           | 0          | 0         | 0        | 0            |
| refRMS               | 73.39        | 46.8     | 55.1        | 90.94       | 89.03      | 76.25     | 60.76    | 45.01        |
| rseed1               | none         | none     | none        | none        | none       | none      | none     | none         |
| rseed2               | none         | none     | none        | none        | none       | none      | none     | none         |
| H-bond formed        | 2            | 1        | 0           | 0           | 0          | 2         | 0        | 0            |
| <b>4L9S</b>          | Indomethacin | Luteolin | Eriodictyol | Pinocembrin | Naringenin | Quercetin | Apigenin | Ferulic Acid |
| binding energy       | -9.47        | -9.21    | -10.39      | -9.6        | -10.22     | -8.86     | -8.66    | -6.36        |
| ligand efficiency    | -0.38        | -0.44    | -0.49       | -0.51       | -0.51      | -0.4      | -0.43    | -0.45        |
| inhib constant       | 113.87       | 176.91   | 24.39       | 92.14       | 32.19      | 319.67    | 448.81   | 21.67        |
| inhib constant units | nM           | nM       | nM          | nM          | nM         | nM        | nM       | uM           |
| intermol energy      | -10.67       | -10.7    | -11.88      | -10.19      | -11.12     | -10.65    | -9.85    | -8.15        |
| vdw hb desolv energy | -10.67       | -10.7    | -11.88      | -10.19      | -11.12     | -10.65    | -9.85    | -8.15        |
| electrostatic energy | 0            | 0        | 0           | 0           | 0          | 0         | 0        | 0            |
| total internal       | -1.45        | -1.99    | 14.93       | -0.25       | -1.98      | -2.65     | -1.02    | 17.76        |
| torsional energy     | 1.19         | 1.49     | 1.49        | 0.6         | 0.89       | 1.79      | 1.19     | 1.79         |
| unbound energy       | -1.45        | -1.99    | 14.93       | -0.25       | -1.98      | -2.65     | -1.02    | 17.76        |

|               |       |       |       |       |       |       |       |       |
|---------------|-------|-------|-------|-------|-------|-------|-------|-------|
| cIRMS         | 0     | 0     | 0.25  | 0     | 0     | 0     | 0     | 0     |
| refRMS        | 38.62 | 31.89 | 30.16 | 31.28 | 29.86 | 31.51 | 31.92 | 35.14 |
| rseed1        | none  |
| rseed2        | none  |
| H-bond formed | 4     | 2     | 2     | 3     | 2     | 3     | 2     | 2     |

---

| 3LN0                 | Indomethacin | Luteolin | Eriodictyol | Pinocembrin | Naringenin | Quercetin | Apigenin | Ferulic Acid |
|----------------------|--------------|----------|-------------|-------------|------------|-----------|----------|--------------|
| binding energy       | -11.22       | -9.82    | -11.54      | -11.35      | -11.96     | -6.08     | -10.15   | -4.72        |
| ligand efficiency    | -0.45        | -0.47    | -0.55       | -0.6        | -0.6       | -0.28     | -0.51    | -0.34        |
| inhib constant       | 6.01         | 63.28    | 3.46        | 4.81        | 1.72       | 34.73     | 36.54    | 345.42       |
| inhib constant units | nM           | nM       | nM          | nM          | nM         | uM        | nM       | uM           |
| intermol energy      | -12.41       | -11.31   | -13.03      | -11.94      | -12.85     | -7.87     | -11.34   | -6.51        |
| vdw hb desolv energy | -12.41       | -11.31   | -13.03      | -11.94      | -12.85     | -7.82     | -11.34   | -5.36        |
| electrostatic energy | 0            | 0        | 0           | 0           | 0          | -0.05     | 0        | -1.15        |
| total internal       | -1.25        | -1.98    | 14.96       | -0.3        | -0.08      | -2.65     | -1.02    | 17.92        |
| torsional energy     | 1.19         | 1.49     | 1.49        | 0.6         | 0.89       | 1.79      | 1.19     | 1.79         |
| unbound energy       | -1.25        | -1.98    | 14.96       | -0.3        | -0.08      | -2.65     | -1.02    | 17.92        |
| cIRMS                | 0            | 0        | 0           | 0           | 0          | 0         | 0        | 0            |
| refRMS               | 90.14        | 87.13    | 92.91       | 37.4        | 72.45      | 81.98     | 71.73    | 40.5         |
| rseed1               | none         | none     | none        | none        | none       | none      | none     | none         |
| rseed2               | none         | none     | none        | none        | none       | none      | none     | none         |
| H-bond formed        | 0            | 1        | 0           | 0           | 0          | 2         | 0        | 0            |



**Table S8.** Molecular Docking Best scored ligand-protein complex data for all 7 ligands with receptors 1CB4, 2CAG and 2P31

| 1CB4                 | Ascorbic Acid | Luteolin | Eriodictyol | Pinocembrin | Naringenin | Quercetin | Apigenin | Ferulic Acid |
|----------------------|---------------|----------|-------------|-------------|------------|-----------|----------|--------------|
| binding energy       | -3.46         | -8.34    | -9.34       | -9.52       | -10.32     | -5.29     | -8.25    | -6.83        |
| ligand efficiency    | -0.31         | 0.4      | -0.44       | -0.5        | -0.52      | -0.24     | -0.41    | -0.49        |
| inhib constant       | 2.93          | 764.23   | 142.3       | 105.15      | 27.26      | 132.82    | 899.88   | 9.93         |
| inhib constant units | mM            | nM       | nM          | nM          | nM         | uM        | nM       | uM           |
| intermol energy      | -4.65         | -9.84    | -10.83      | -10.12      | -11.21     | -7.08     | -9.44    | -8.61        |
| vdw hb desolv energy | -4.42         | -9.84    | -10.83      | -10.12      | -11.21     | -6.96     | -9.44    | -8.61        |
| electrostatic energy | -0.23         | 0        | 0           | 0           | 0          | -0.12     | 0        | 0            |
| total internal       | -1.67         | -1.98    | 14.95       | -0.29       | -0.08      | -2.24     | -1.02    | 17.92        |
| torsional energy     | 1.19          | 1.49     | 1.49        | 0.6         | 0.89       | 1.79      | 1.19     | 1.79         |
| unbound energy       | -1.67         | -1.98    | 14.95       | -0.29       | -0.08      | -2.24     | -1.02    | 17.92        |
| cIRMS                | 0             | 0        | 0           | 0.09        | 0          | 0         | 0        | 0            |
| refRMS               | 72.15         | 67.01    | 69.12       | 69.45       | 69.76      | 67.45     | 67.87    | 71.4         |
| rseed1               | none          | none     | none        | none        | none       | none      | none     | none         |
| rseed2               | none          | none     | none        | none        | none       | none      | none     | none         |
| H-bond formed        | 3             | 0        | 0           | 0           | 2          | 3         | 0        | 0            |
| 2CAG                 | Ascorbic Acid | Luteolin | Eriodictyol | Pinocembrin | Naringenin | Quercetin | Apigenin | Ferulic Acid |
| binding energy       | -3.64         | -9.33    | -11.15      | -11.17      | -11.87     | -9.96     | -10.08   | -6.76        |
| ligand efficiency    | -0.33         | -0.44    | -0.53       | -0.59       | -0.59      | -0.45     | -0.5     | -0.48        |
| inhib constant       | 2.16          | 145.12   | 6.68        | 6.45        | 1.99       | 49.71     | 41.03    | 11.01        |

|                |       |        |        |        |        |        |        |        |
|----------------|-------|--------|--------|--------|--------|--------|--------|--------|
| inhib          | mM    | nM     | nM     | nM     | nM     | nM     | nM     | uM     |
| constant       |       |        |        |        |        |        |        |        |
| units          |       |        |        |        |        |        |        |        |
| intermol       | -5.13 | -10.82 | -12.64 | -11.77 | -12.77 | -11.75 | -11.27 | -8.55  |
| energy         |       |        |        |        |        |        |        |        |
| vdw            | hb    | -4.93  | -10.82 | -12.64 | -11.77 | -12.77 | -11.75 | -11.27 |
| desolv         |       |        |        |        |        |        |        |        |
| energy         |       |        |        |        |        |        |        |        |
| electrostatic  | -0.2  | 0      | 0      | 0      | 0      | 0      | 0      | 0      |
| energy         |       |        |        |        |        |        |        |        |
| total internal | -1.68 | -1.98  | 14.93  | -0.3   | -0.06  | -2.57  | -1.03  | 17.71  |
| torsional      | 1.49  | 1.49   | 1.49   | 0.6    | 0.89   | 1.79   | 1.19   | 1.79   |
| energy         |       |        |        |        |        |        |        |        |
| unbound        | -1.68 | -1.98  | 14.93  | -0.3   | -0.06  | -2.57  | -1.03  | 17.71  |
| energy         |       |        |        |        |        |        |        |        |
| cIRMS          | 0     | 0      | 0      | 0      | 0      | 0      | 0      | 0      |
| refRMS         | 63.49 | 55.2   | 58.06  | 59.93  | 58.64  | 53.73  | 53.26  | 56.31  |
| rseed1         | none  | none   | none   | none   | none   | none   | none   | none   |
| rseed2         | none  | none   | none   | none   | none   | none   | none   | none   |
| H-bond         | 0     | 1      | 2      | 3      | 2      | 2      | 0      | 0      |
| formed         |       |        |        |        |        |        |        |        |

|                |                  |          |             |             |            |           |          |                 |
|----------------|------------------|----------|-------------|-------------|------------|-----------|----------|-----------------|
| 2P31           | Ascorbic<br>Acid | Luteolin | Eriodictyol | Pinocembrin | Naringenin | Quercetin | Apigenin | Ferulic<br>Acid |
| binding        | -4.49            | -7.19    | -9.74       | -10.85      | -10.16     | -6.41     | -6.58    | -7.15           |
| energy         |                  |          |             |             |            |           |          |                 |
| ligand         | -0.41            | -0.34    | -0.46       | -0.57       | -0.51      | -0.29     | -0.33    | -0.51           |
| efficiency     |                  |          |             |             |            |           |          |                 |
| inhib          | 512.61           | 5.37     | 72.43       | 11.08       | 35.66      | 19.86     | 15.05    | 5.75            |
| constant       |                  |          |             |             |            |           |          |                 |
| inhib          | uM               | uM       | nM          | nM          | nM         | uM        | uM       | uM              |
| constant       |                  |          |             |             |            |           |          |                 |
| units          |                  |          |             |             |            |           |          |                 |
| intermol       | -5.68            | -8.68    | -11.23      | -11.45      | -11.06     | -8.2      | -7.77    | -8.94           |
| energy         |                  |          |             |             |            |           |          |                 |
| vdw            | hb               | -5.48    | -8.68       | -11.23      | -11.45     | -11.06    | -7.77    | -8.94           |
| desolv         |                  |          |             |             |            |           |          |                 |
| energy         |                  |          |             |             |            |           |          |                 |
| electrostatic  | -0.21            | 0        | 0           | 0           | 0          | 0         | 0        | 0               |
| energy         |                  |          |             |             |            |           |          |                 |
| total internal | -1.64            | -1.91    | 15.02       | -0.3        | -0.09      | -2.64     | -1.02    | 17.81           |

---

|                     |       |       |       |       |       |       |       |       |
|---------------------|-------|-------|-------|-------|-------|-------|-------|-------|
| torsional<br>energy | 1.19  | 1.49  | 1.49  | 0.6   | 0.89  | 1.79  | 1.19  | 1.79  |
| unbound<br>energy   | -1.64 | -1.91 | 15.02 | -0.3  | -0.09 | -2.64 | -1.02 | 17.81 |
| cIRMS               | 0     | 0     | 0     | 0     | 0     | 0     | 0     | 0     |
| refRMS              | 28.06 | 30.09 | 30.16 | 28.98 | 29.15 | 27.34 | 19.82 | 28.89 |
| rseed1              | none  |
| rseed2              | none  |
| H-bond<br>formed    | 2     | 0     | 0     | 0     | 0     | 2     | 1     | 1     |

---
